# Supplementary material
Source: publisher figshare collection journal article supplement (https://aacr.figshare.com/articles/dataset/_/22549945)

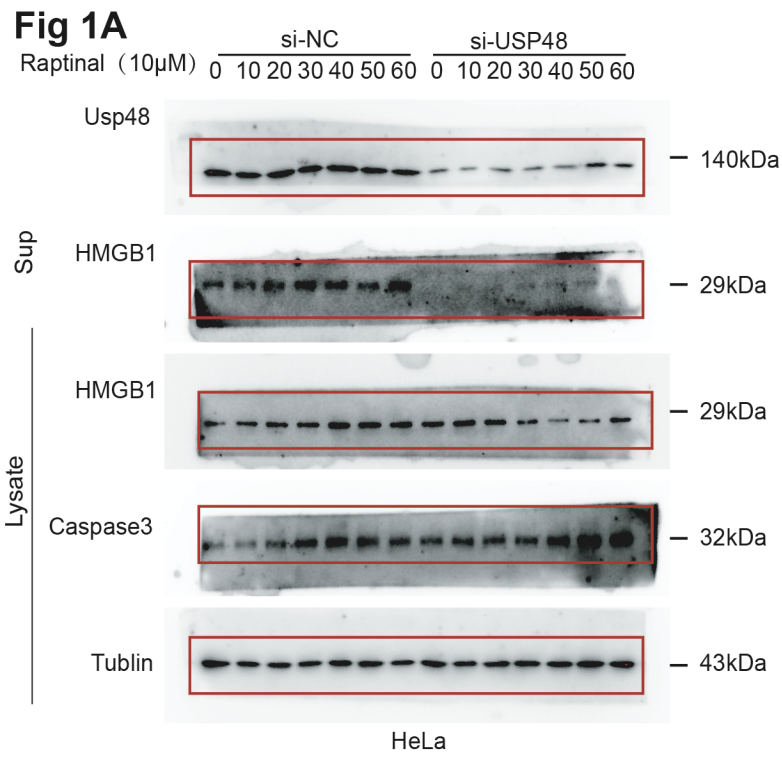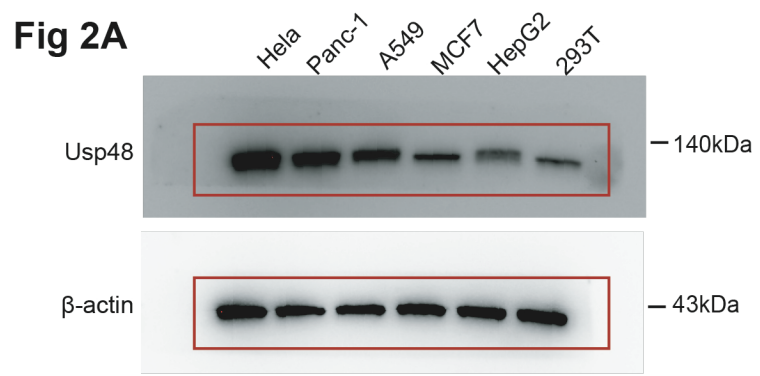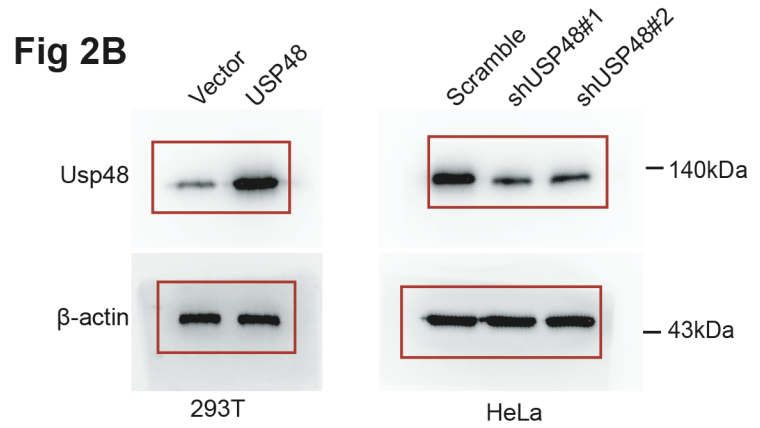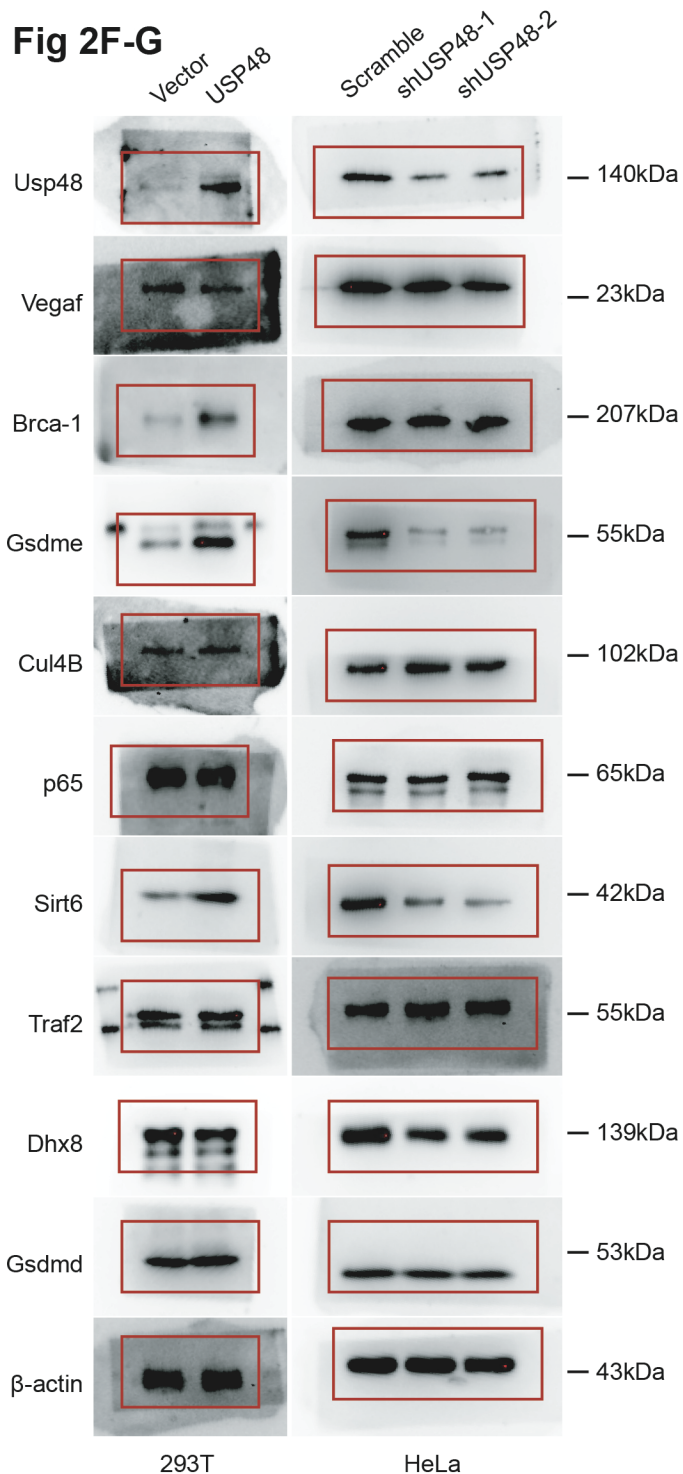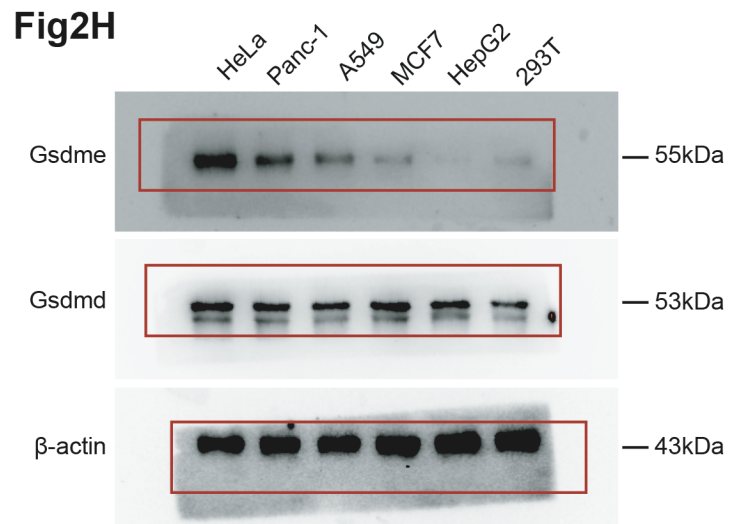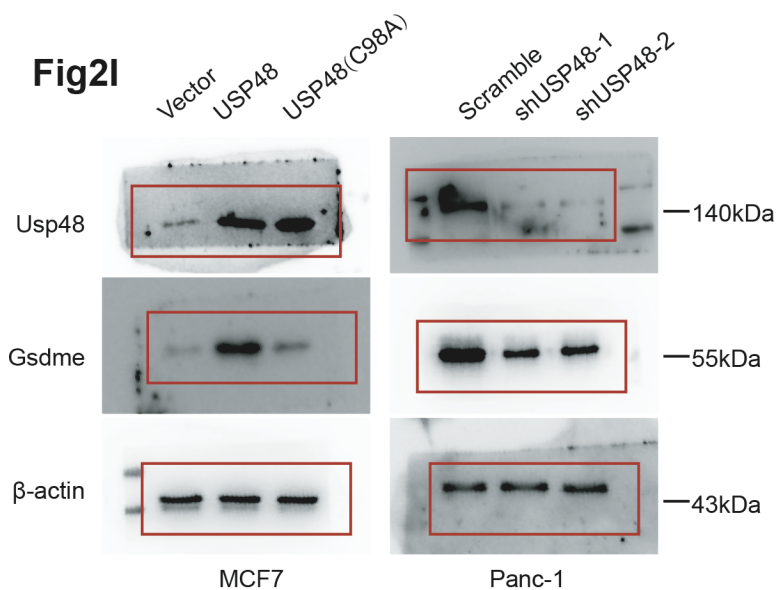

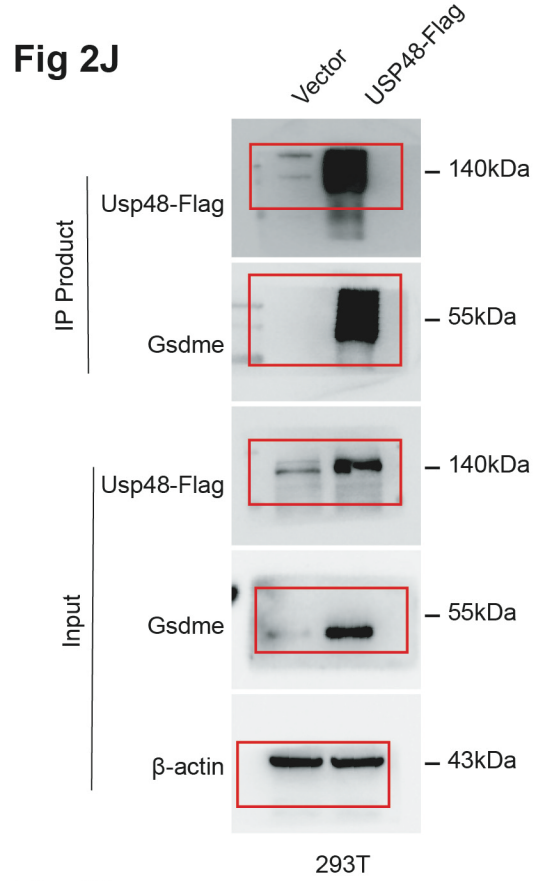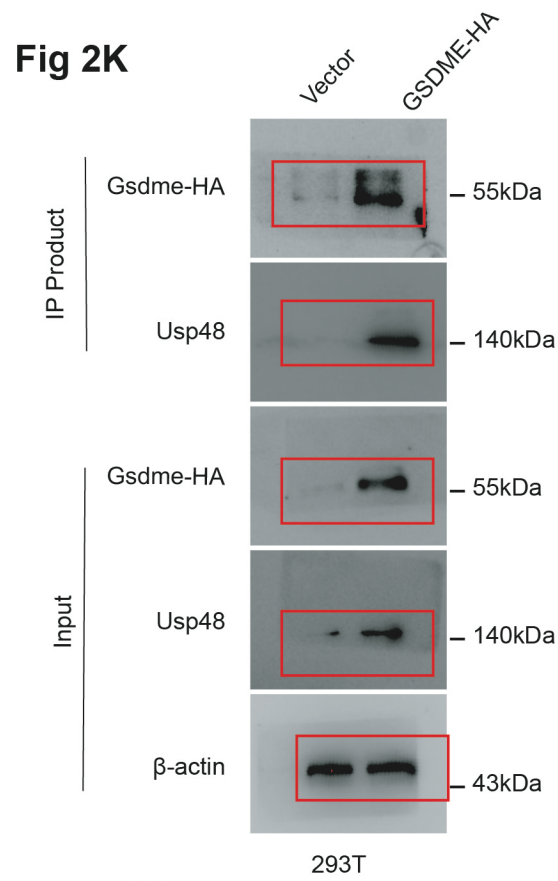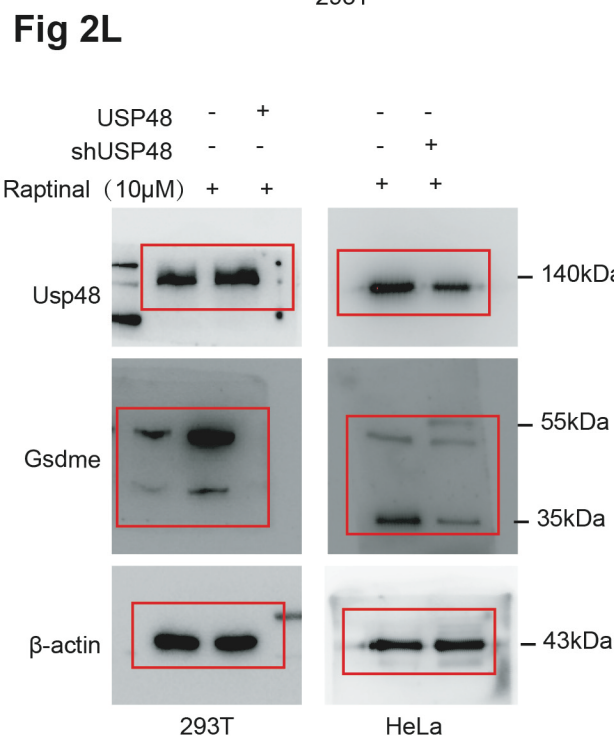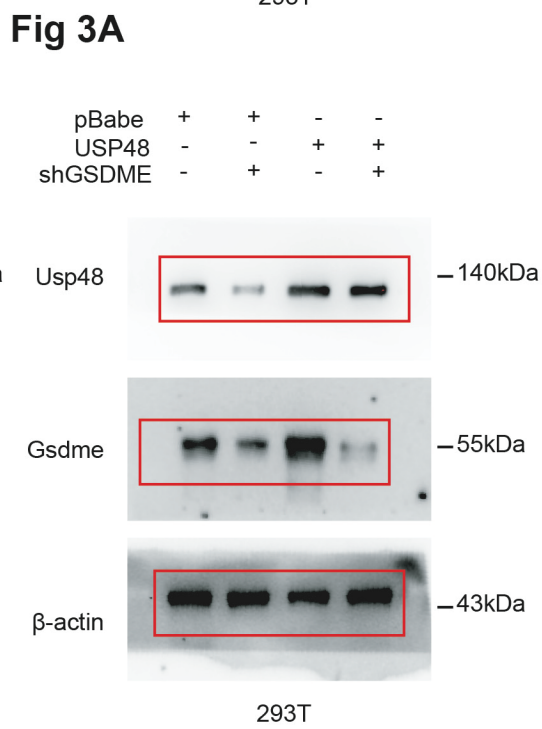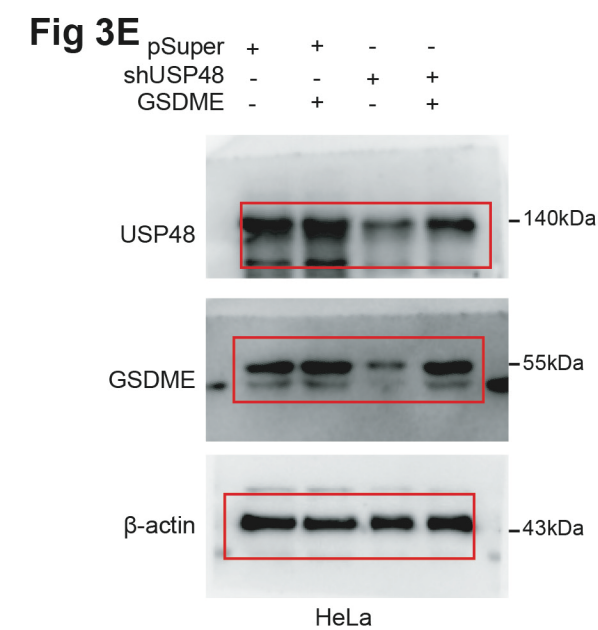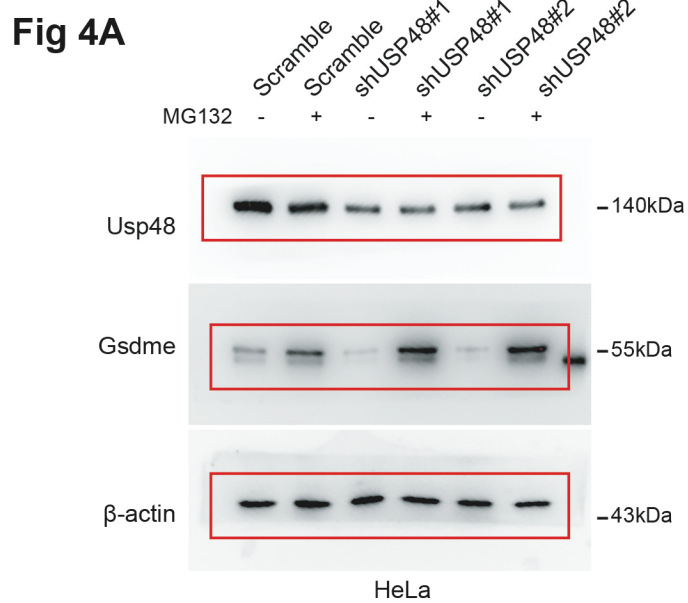

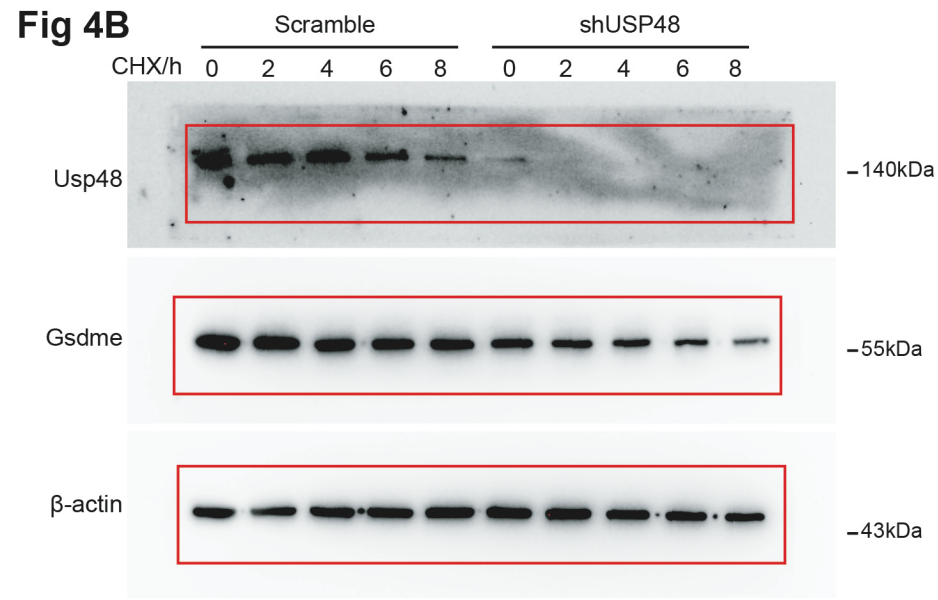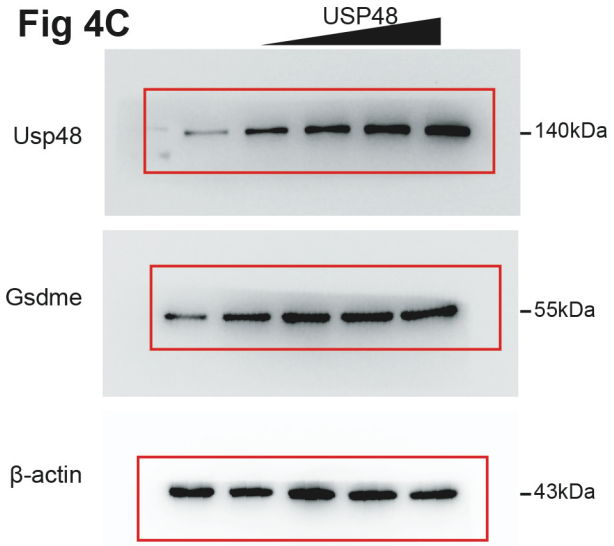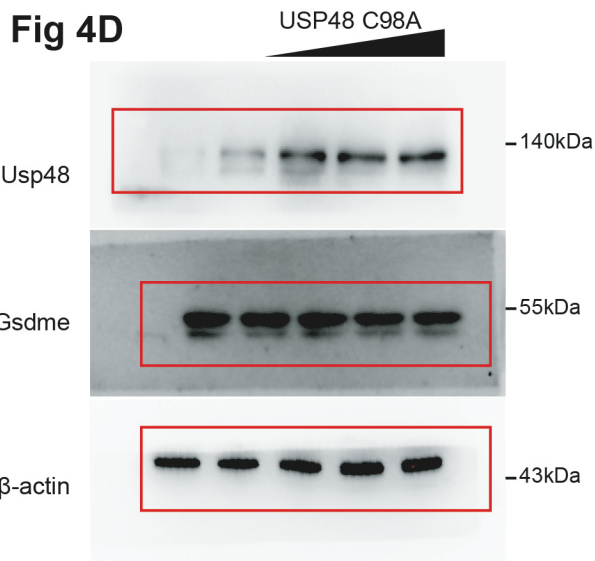

**Fig 4E**

|                 | 293T |   |   |
|-----------------|------|---|---|
| Myc-GSDME       | +    | + | + |
| Flag-USP48/WT   | -    | + | - |
| Flag-USP48/C98A | -    | - | + |
| HA-Ubiquitin    | +    | + | + |

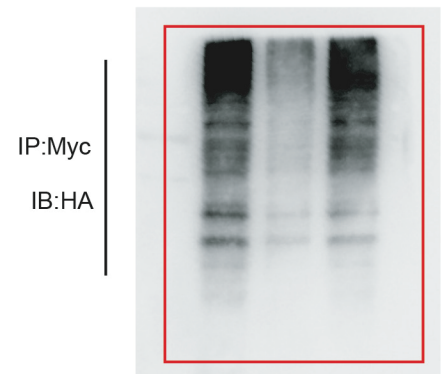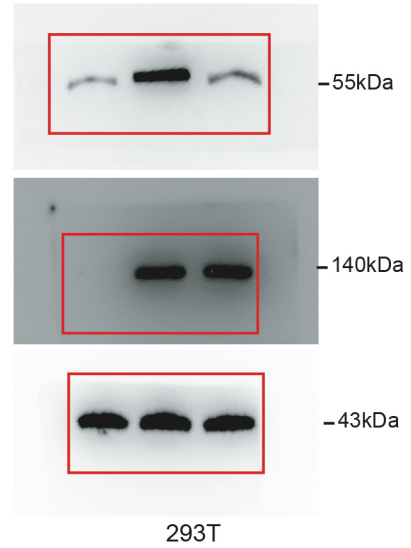

**Fig 4F**

|              | 293T |   |   |
|--------------|------|---|---|
| Myc-GSDME    | +    | + | + |
| shUSP48#1    | -    | + | - |
| shUSP48#2    | -    | - | + |
| HA-Ubiquitin | +    | + | + |

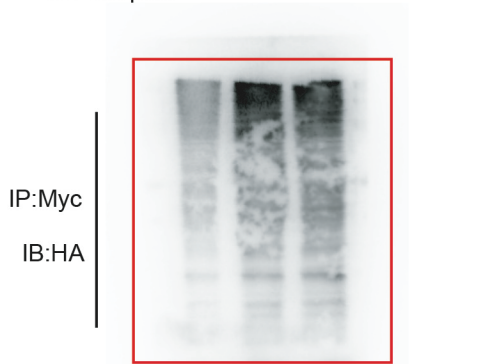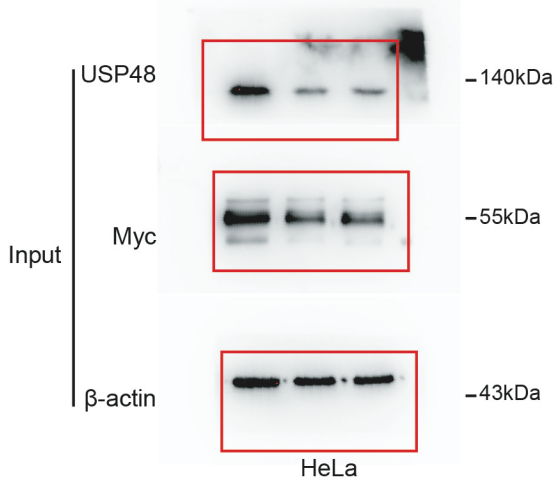



**Fig 4G**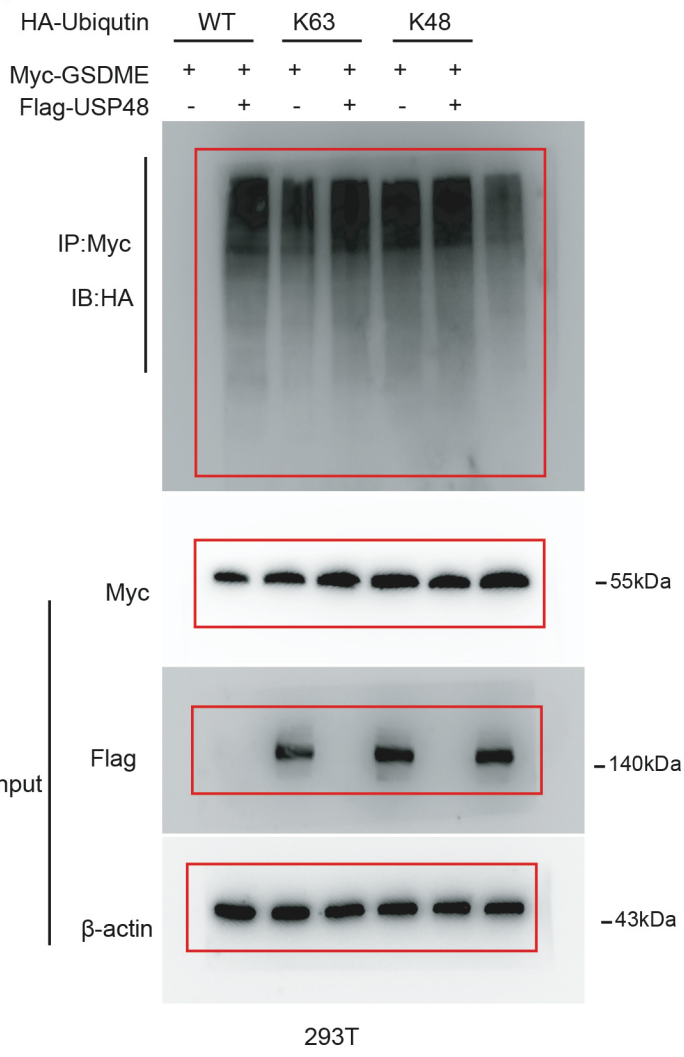**Fig 4I**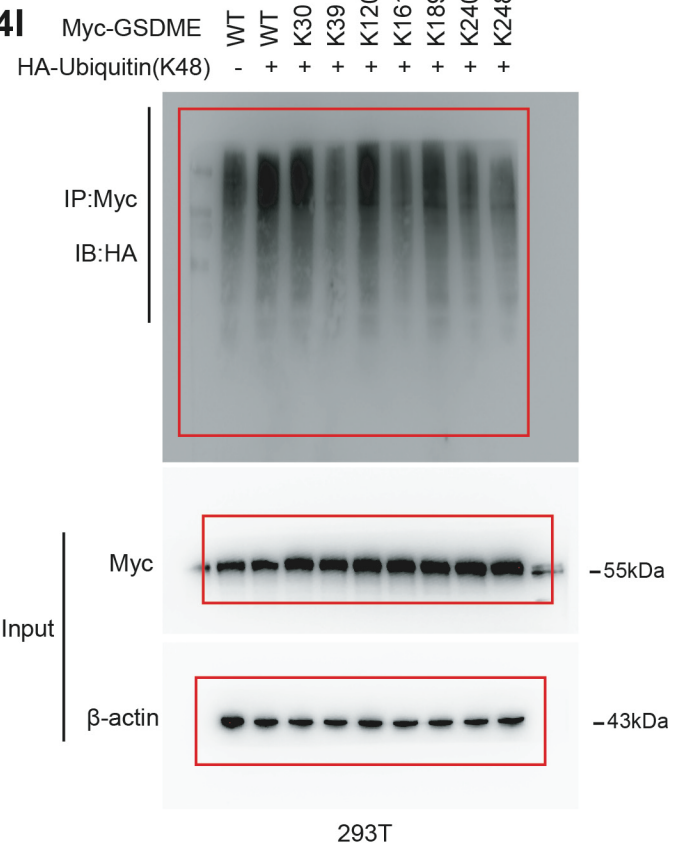**Fig 4K**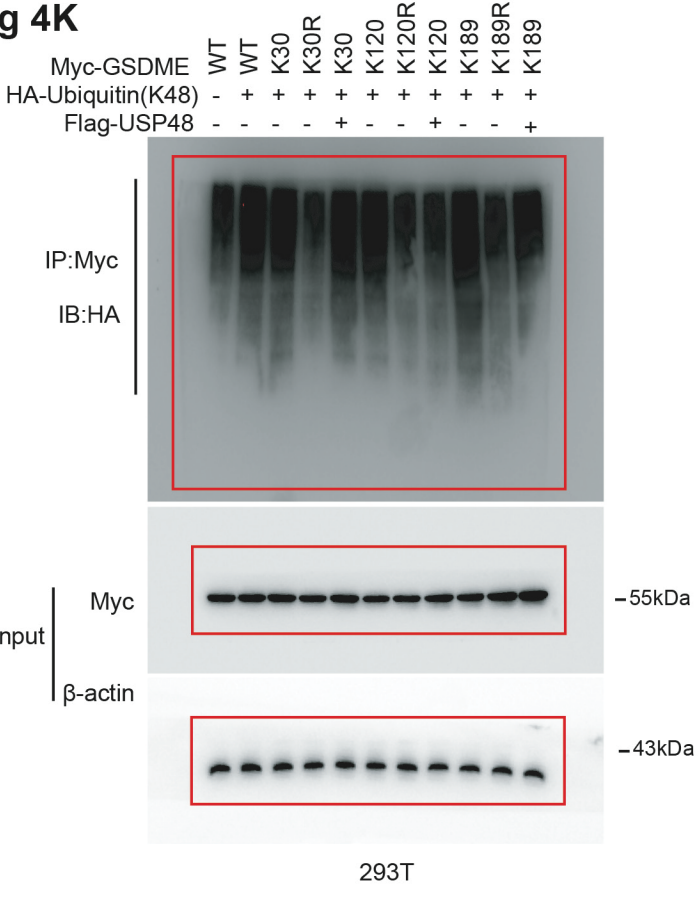**Fig 5G**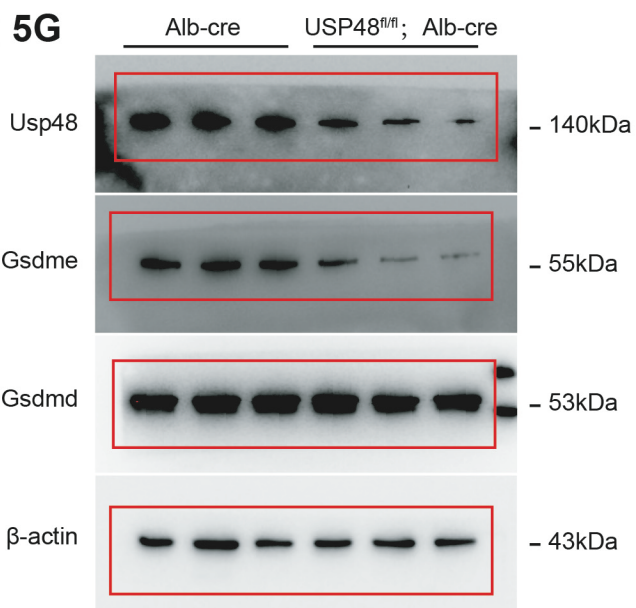**Fig 5H**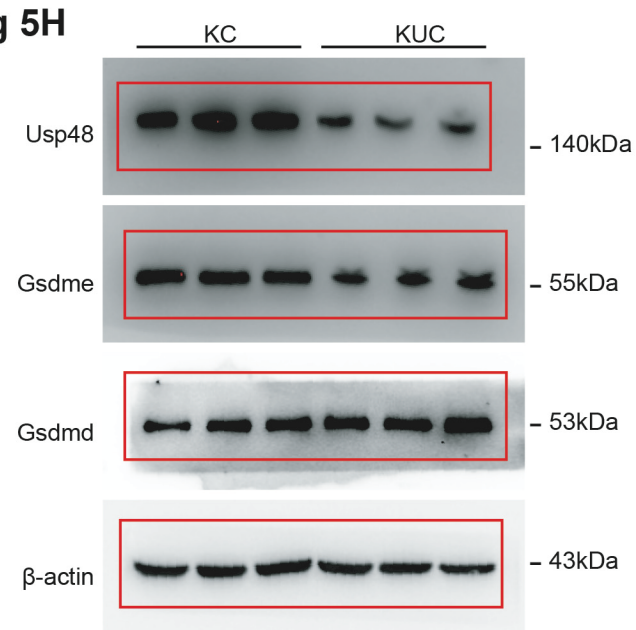



## Supplementary Fig 1L

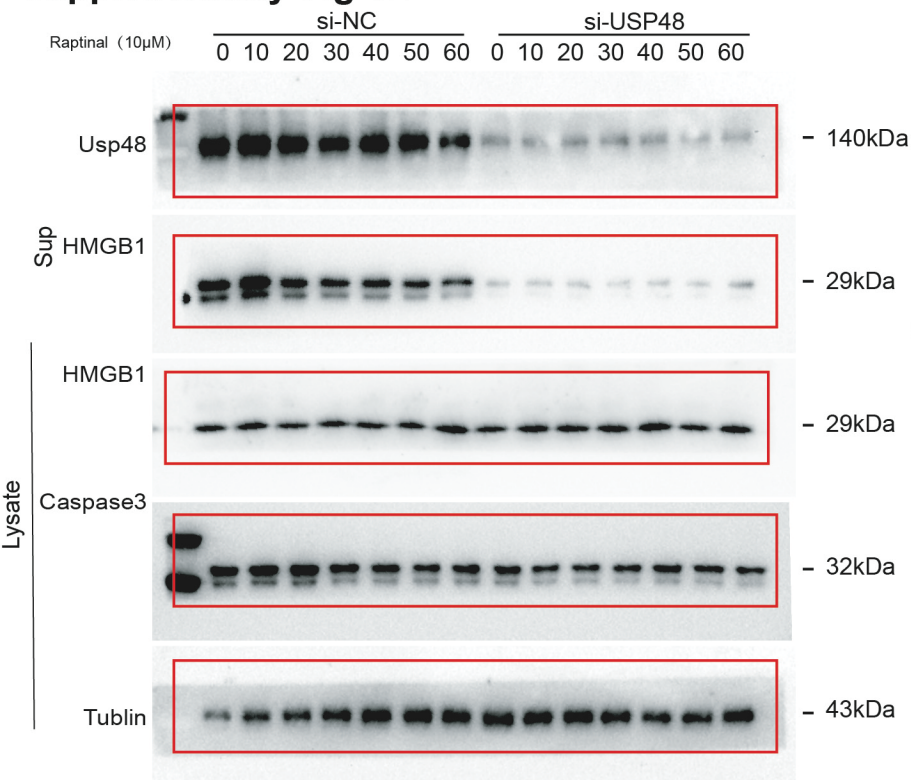

L929

## Supplementary Figure 4A

|         |   |   |   |   |
|---------|---|---|---|---|
| pBabe   | + | + | - | - |
| USP48   | - | - | + | + |
| shGSDME | - | + | - | + |

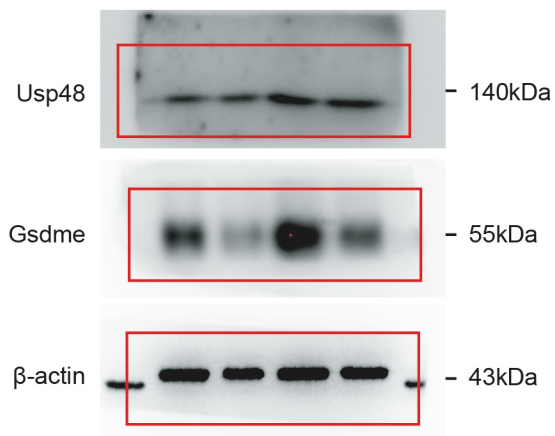

L929

|         |   |   |   |   |
|---------|---|---|---|---|
| pSuper  | + | + | - | - |
| shUSP48 | - | - | + | + |
| GSDME   | - | + | - | + |

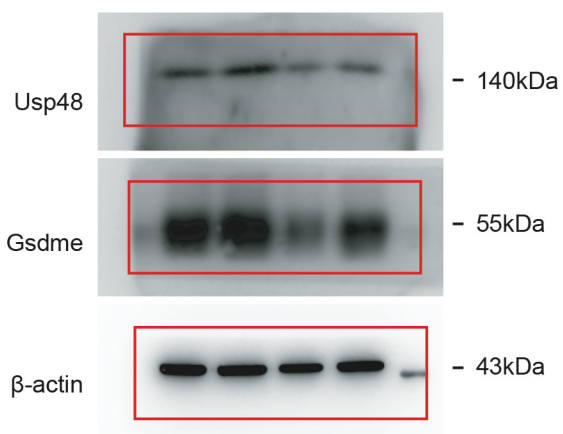

L929

## Supplementary Fig 3B

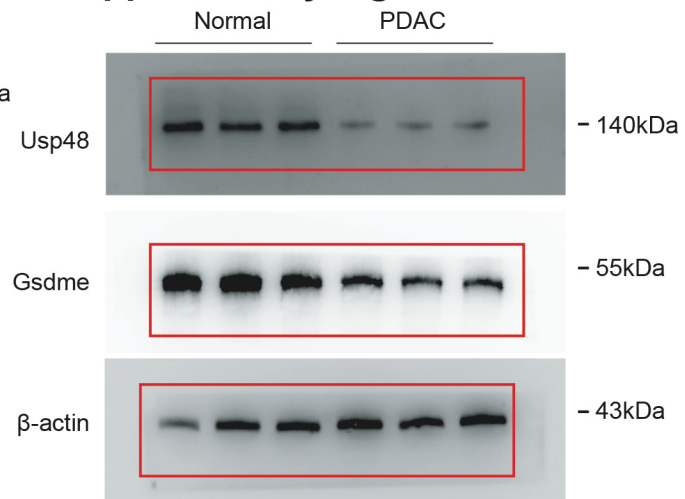

## Supplementary Fig 3E

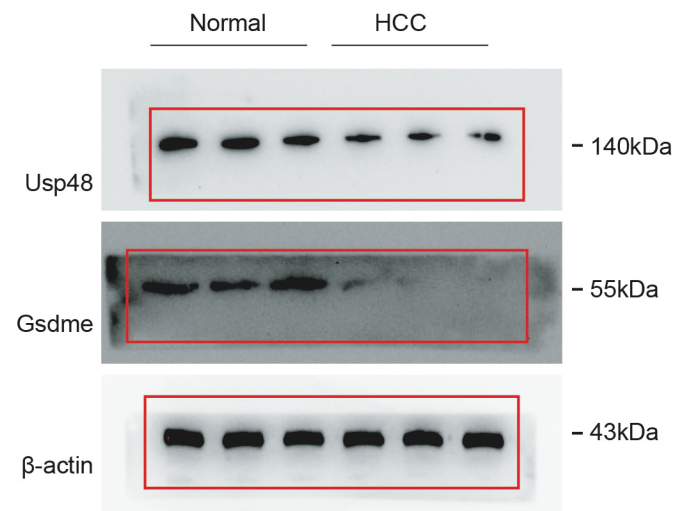

## Supplementary Figure 5A

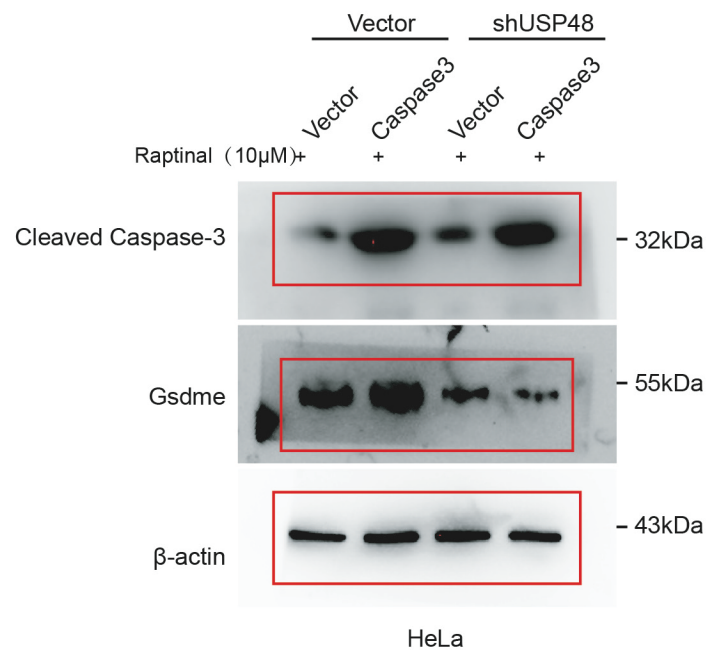

HeLa

### Supplementary Figure 5F

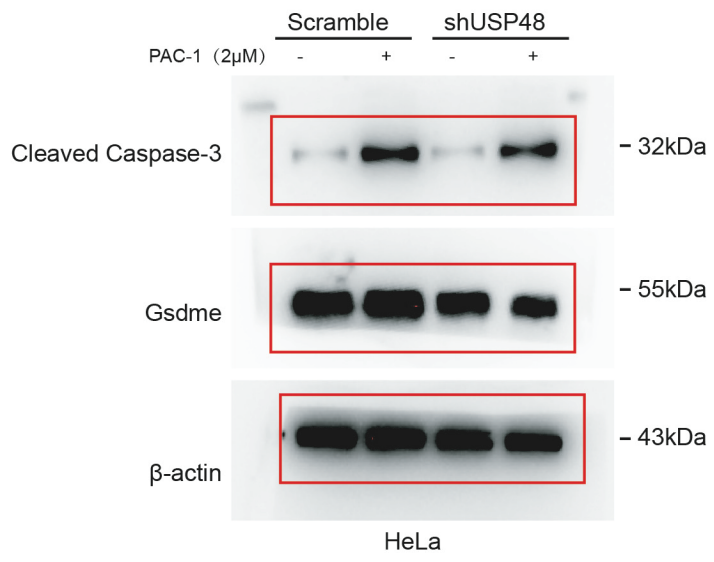

### Supplementary Figure 6A

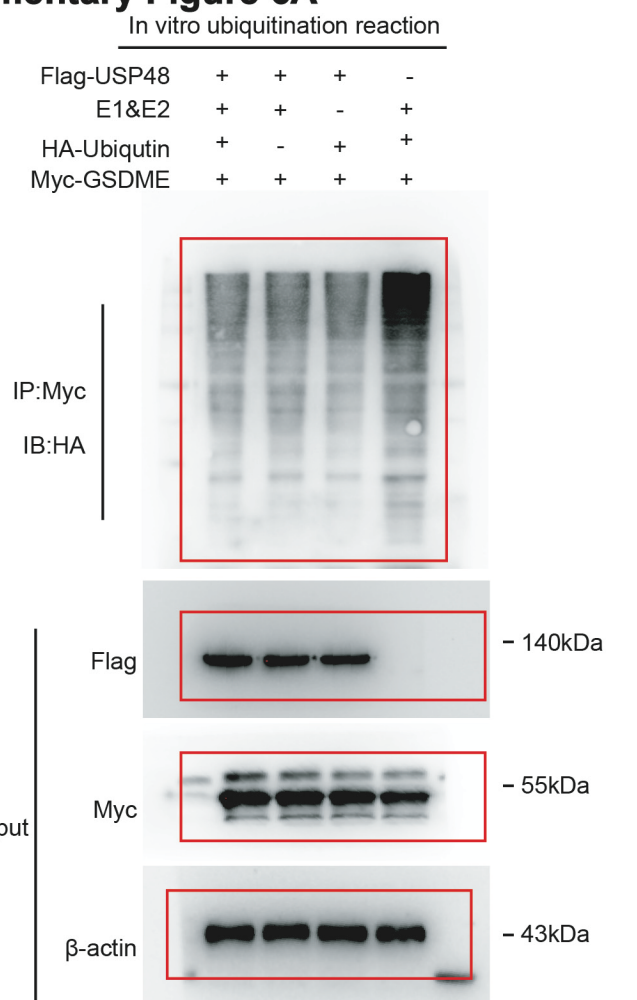

### Supplementary Figure 6D

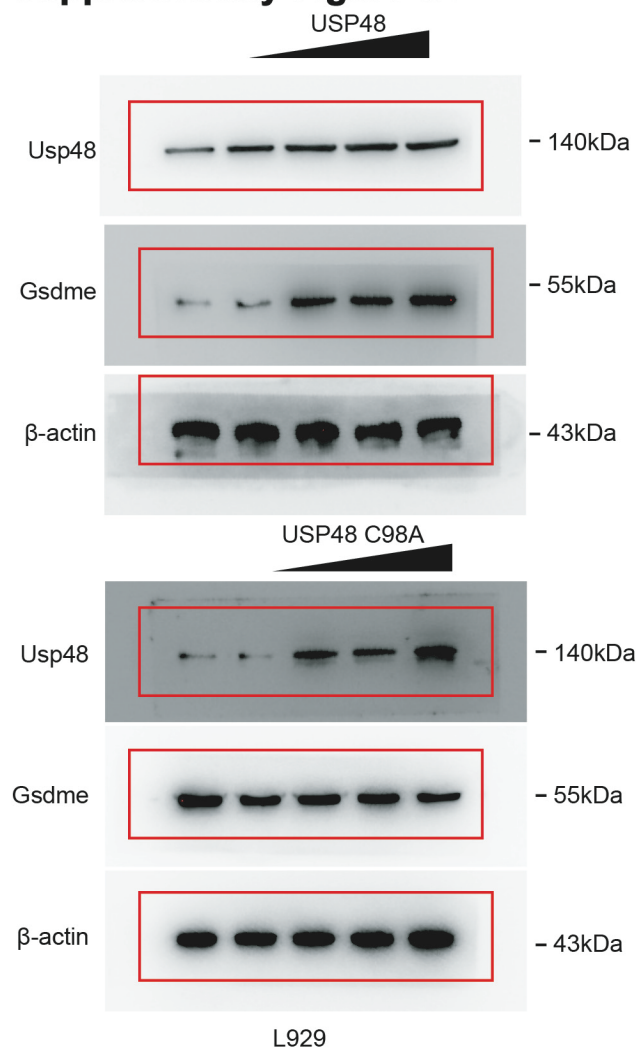

### Supplementary Figure 6E

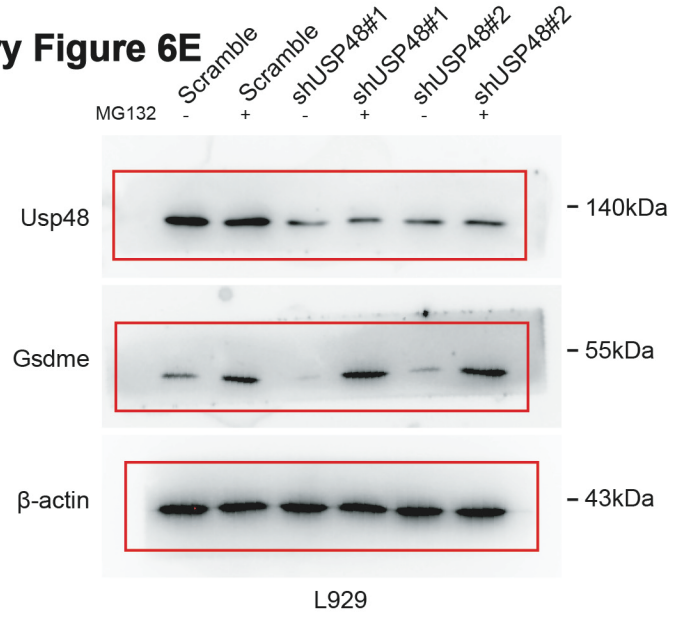

### Supplementary Figure 6F

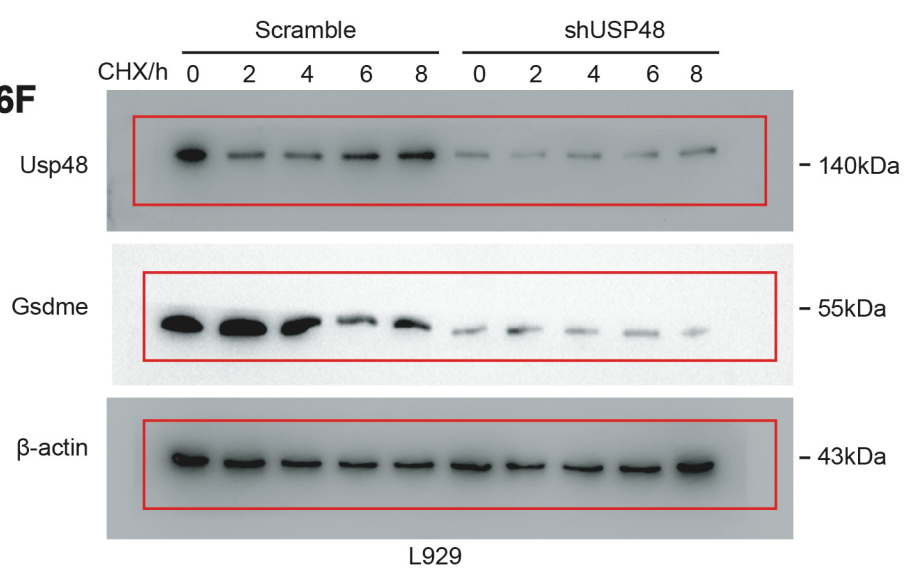

Supplement: Supplementary file 1 [file 40016275]
